# Supplementary material for: Impact of the in situ rise in hydrogen partial pressure on graphene shape evolution during CVD growth of graphene
Source: Royal Society of Chemistry journal article supplement (doi:10.1039/c7ra13169k), 2018-01-01
Supplement: c7ra13169k1.pdf [file c7ra13169k1.pdf]

## Supporting information

### Impact of the *in-situ* rise of hydrogen partial pressure on graphene shape evolution during CVD growth of graphene

Zewdu M. Gebeyehu<sup>a,b\*</sup>, Alois Arrighi<sup>a,b</sup>, Marius V. Costache<sup>a</sup>, Clivia M. Sotomayor-Torres<sup>a,c</sup>, Maria J. Esplandiu<sup>a,b\*</sup>, Sergio O. Valenzuela<sup>a,c\*</sup>

#### Methods

##### Copper foil preparation

A 25  $\mu\text{m}$  thick copper foil (99.8%, Alfa Aesar, stock #13382) was cleaned in acetone and isopropyl alcohol (IPA) for 10 min each to remove organic contaminants. In order to remove surface oxides and other inorganic contaminants, the copper foil was chemically etched using acetic acid/water (1/3) and then thoroughly rinsed with DI water followed by blow-drying with nitrogen gas. For the inspection of the hydrogen etching impact on the catalyst geometrical arrangement (confinement), the copper foil was subjected to a different confinement. In brief, the copper foil was bent into two parts to make half of the copper foil part vertical (non-confined) and half part horizontal (confined) by sandwiching (Fig. 5) it between the sample holder and the quartz glass slide.

##### Growth of graphene

Growth was performed using a (Lindberg/Blue M, Asheville, NC, USA) furnace and 1-meter long 1-inch diameter quartz tube. Cleaned copper foils were loaded into the growth chamber and the tube was evacuated and all the gases were purged for 5 min in vacuum before heating up. The copper foil was annealed in Ar (99.9992% purity) 450 sccm and  $\text{H}_2$  (99.999% purity) 50 sccm at 1000  $^{\circ}\text{C}$ .  $\text{O}_2$  was flowed with 1 sccm for 2 min with Ar (450 sccm) and 0 sccm of hydrogen for oxidative passivation of the copper foil just right before the growth started. Then graphene was grown in Ar 450 sccm,  $\text{H}_2$  50 sccm and  $\text{CH}_4$  1 sccm (99.995 %) at 1000  $^{\circ}\text{C}$ . After growth, the  $\text{CH}_4$  was turned-off and the system was fast cooled down to room temperature under Ar/ $\text{H}_2$  atmosphere by taking the quartz tube out of the furnace. As-grown graphene on copper foil was heated on a hot plate for 2 min to increase the contrast difference between graphene and copper during microscopic imaging.

##### Transfer of graphene to $\text{SiO}_2/\text{Si}$ and TEM grid

The graphene flakes were transferred onto  $\text{SiO}_2/\text{Si}$  and TEM grid with polymethyl methacrylate (PMMA) assisted transfer for TEM and Raman characterization. PMMA (A4 950 K) was spin coated on Copper/graphene layer at 3000 rpm for 40 seconds (3x) followed by air drying overnight. The underneath graphene was removed floating on 20% nitric acid for 2.5 min followed by rinsing with deionized water. Then the copper was etched floating on a 0.5 M  $\text{FeCl}_3$  solution. Then PMMA/graphene stack was cleaned with deionized water (3x), 10 %

HCl for 10 min and then again with deionized water (2x). The PMMA/graphene was fished out from deionized water using **SiO<sub>2</sub>/Si (440 nm)** or TEM grid , dried and cured at 85 °C for 30 min. PMMA was removed by soaking the PMMA/graphene stack in hot acetone at 50 °C and rinsed with isopropanol alcohol

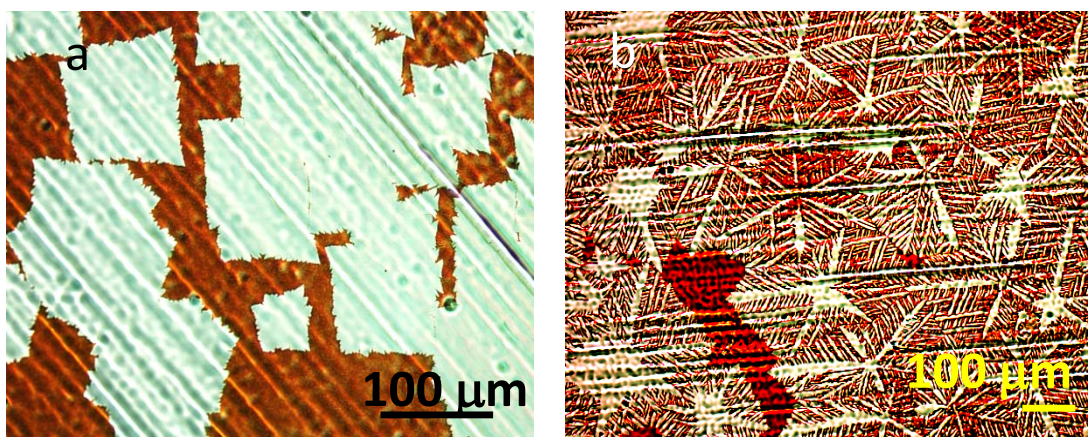

Figure S1. Typical optical microscope images of graphene (white color) on copper foil showing the effect of growth times: (a) 10 min showing unetched graphene and (b) 60 min showing etched graphene without using specific etching condition. lighter color is graphene.

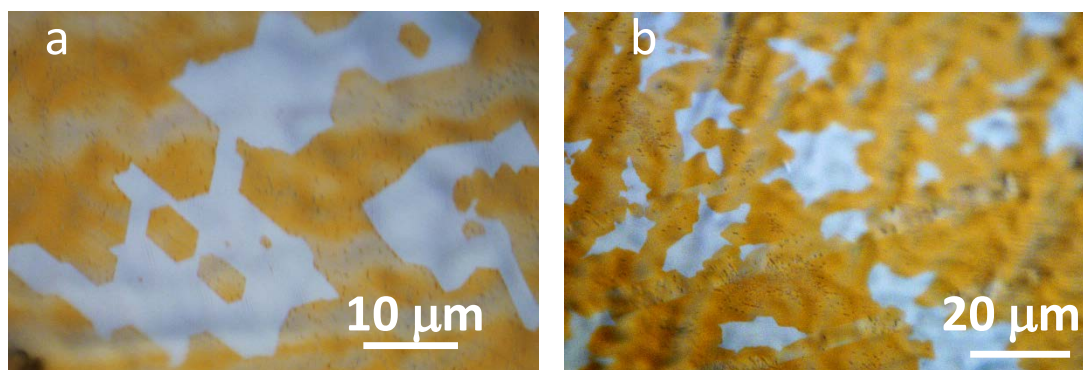

Figure S2. Optical images of oxidatively etched graphene. Graphene was first grown during 20 min with the standard protocol followed by additional 10 min growth but at reduced hydrogen flow. (a) 5 sccm H<sub>2</sub> showing an anisotropic etching with hexagonal holes and (b) 0 sccm H<sub>2</sub>, the graphene is aggressively etched with the oxidative environment but still has a sign of anisotropic etching. White color is graphene.

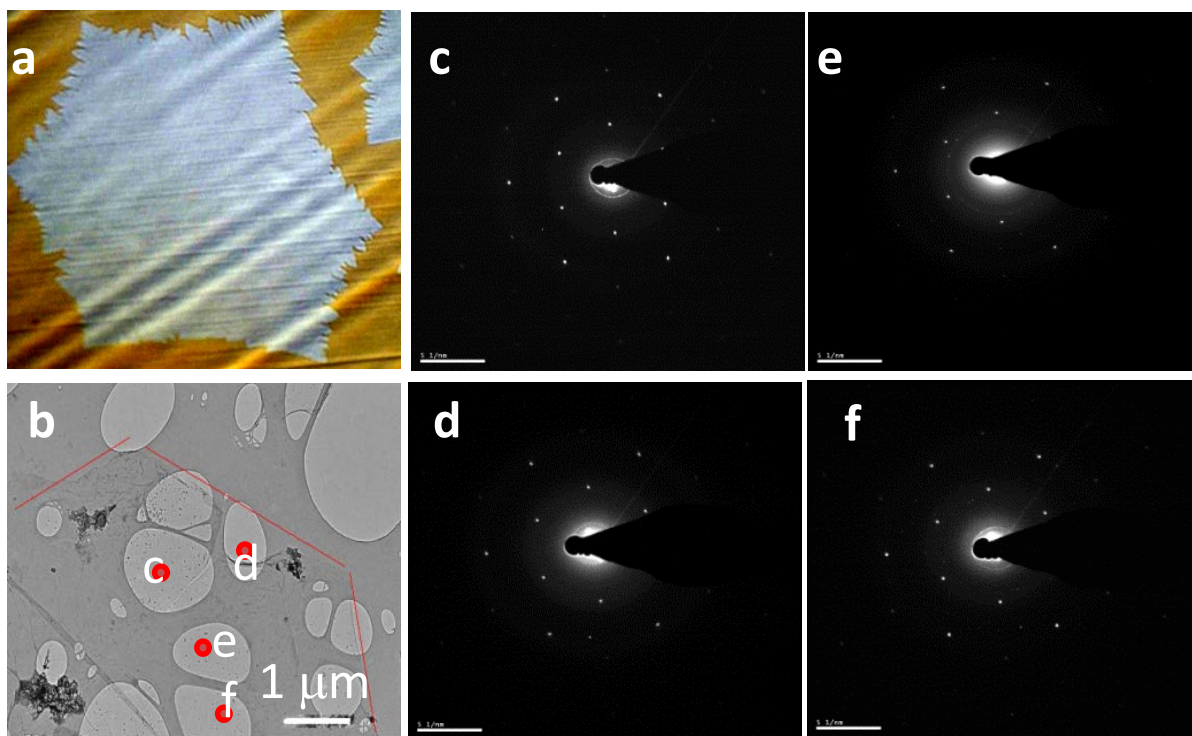

Figure S3. TEM analysis for typical graphene grown during 10 min. (a) Optical microscope image of hexagonal graphene on copper foil, (b) TEM image on TEM grid and (c-f) representative SAED patterns of single domain graphene at the four different positions indicated in (b). The electron diffraction patterns of the domain show single-crystalline nature.

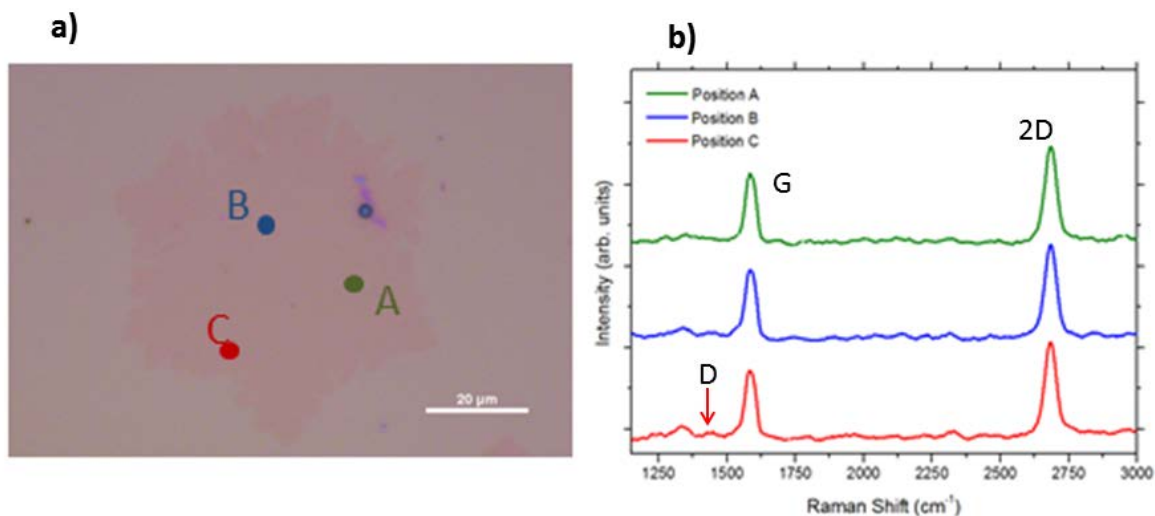

Figure S4. Raman spectra of a typical graphene flake. a) Optical image of a graphene flake grown during 20 min and transferred to  $\text{SiO}_2/\text{Si}$  (440 nm), b) Raman spectra at 300 K for the graphene flake depicted in a) at points A,B,C showing the uniformity of the flake in the entire region. We chose three points randomly on the flake (a) and obtained the Raman G peaks at around  $1585 \text{ cm}^{-1}$  and the 2D peaks at around  $2683 \text{ cm}^{-1}$ . The presence of a small D peak below  $1400 \text{ cm}^{-1}$  could be associated with transfer related wrinkling.



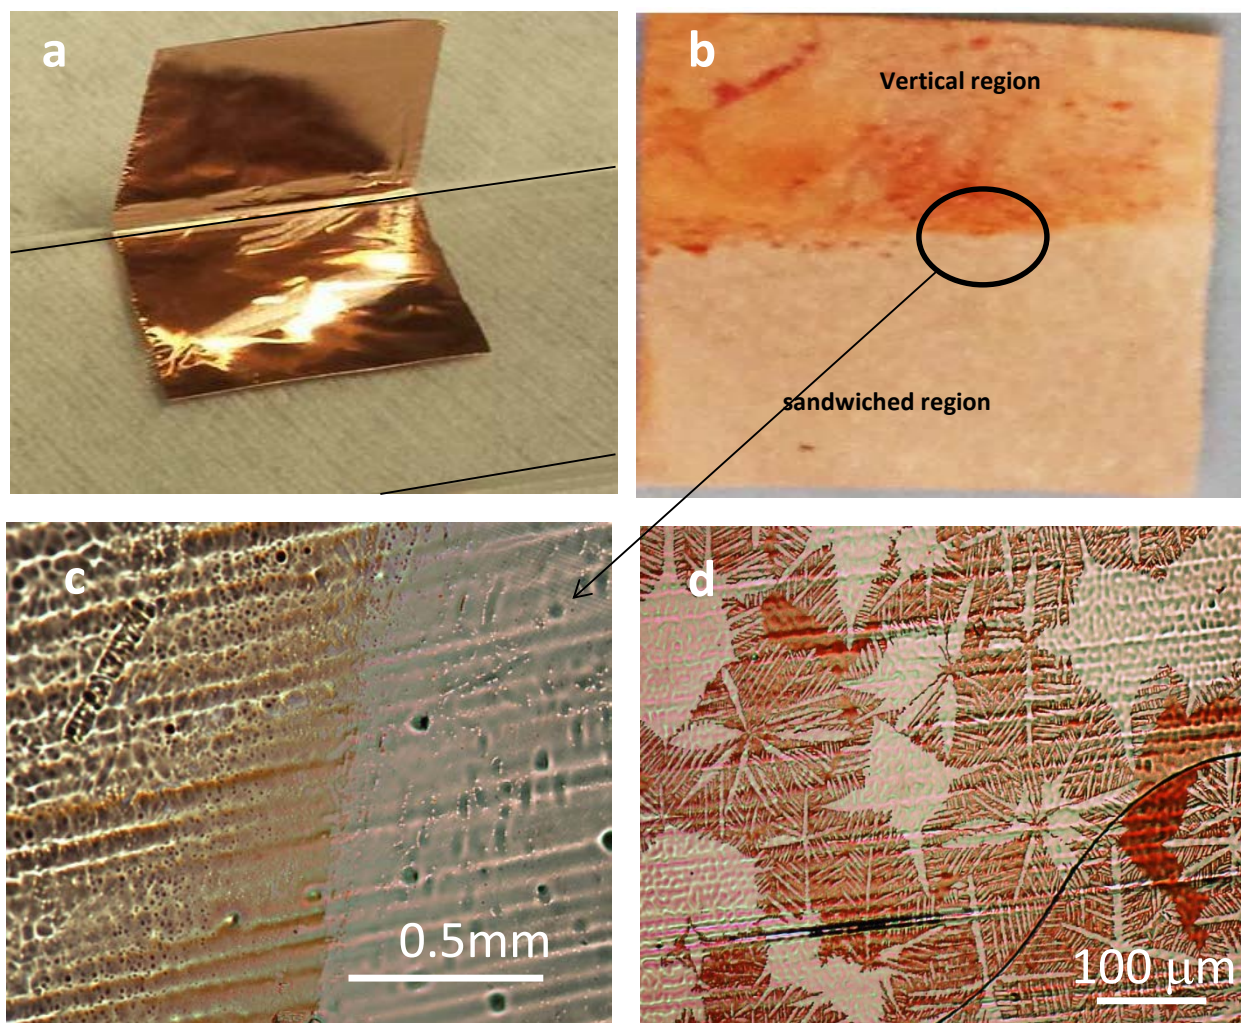

Figure S5. (a) Image of a bent copper foil ready for growth (the horizontal position is sandwiched between a quartz slide and a sample holder). (b) Photo of flattened graphene/copper foil after 60 min growth. The vertical region is reddish indicating the presence of uncovered graphene or etched region whereas the horizontal sandwiched region is whiter which indicates fully covered and unetched graphene. (c) Optical microscope image showing both vertical (left) and sandwiched (right) regions. (d) Zoomed optical image on the sandwiched region with highly etched graphene.
